# Supplementary material for: Colorimetric immunoassay of carcinoembryonic antigen based on the glucose oxidase/MnO2 nanosheet cascade reaction with self-supplying oxygen
Source: Royal Society of Chemistry journal article supplement (doi:10.1039/d3ay01425h), 2023-01-01
Supplement: d3ay01425h1.pdf [file d3ay01425h1.pdf]

## Supporting Information

### **Colorimetric immunoassay of carcinoembryonic antigen based on glucose oxidase/MnO<sub>2</sub> nanosheet cascade reaction with self-supplying oxygen**

Yuanzhi Yao <sup>a</sup>, Jinhong Wang <sup>b</sup>, Ziqi Wang <sup>a</sup>, Shenghua Li<sup>\*a</sup>, and Hongliang Tan <sup>\* a,b</sup>,

<sup>a</sup> Key Laboratory of Research and Utilization of Ethnomedicinal Plant Resources of Hunan Province, College of Biological and Food Engineering, Huaihua University, Huaihua 418000, China

<sup>b</sup> College of Chemistry and Chemical Engineering, Jiangxi Normal University, Nanchang 330022, China

\*Corresponding Author: [lishenghua110@126.com](mailto:lishenghua110@126.com) (S.L); [hltan@jxnu.edu.cn](mailto:hltan@jxnu.edu.cn) (H.T.)

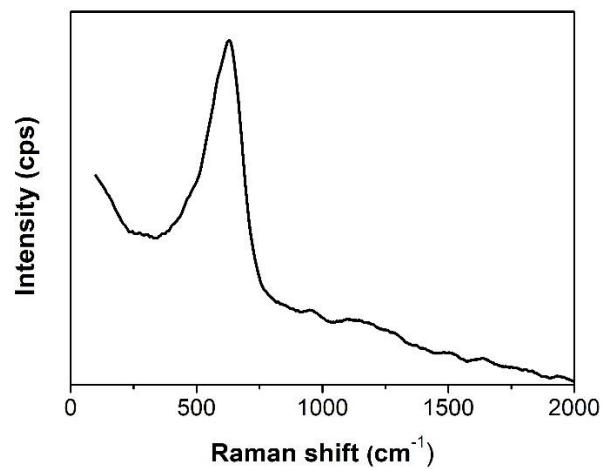

Figure S1. Raman spectrum of MnO<sub>2</sub> nanosheet.

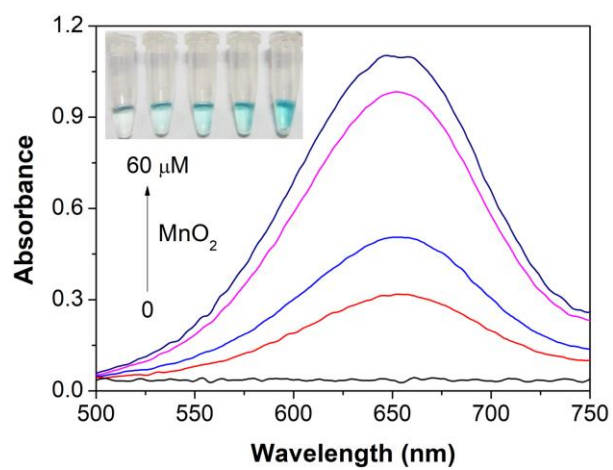

Figure S2. Absorption spectra of TMB in the presence of MnO<sub>2</sub> nanosheet with different concentration.

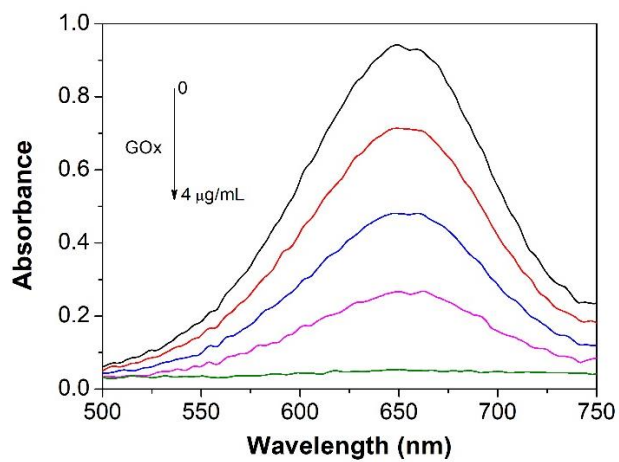

Figure S3. Absorption spectra of TMB in the presence of the mixture of MnO<sub>2</sub> nanosheet and GOx with different concentration.

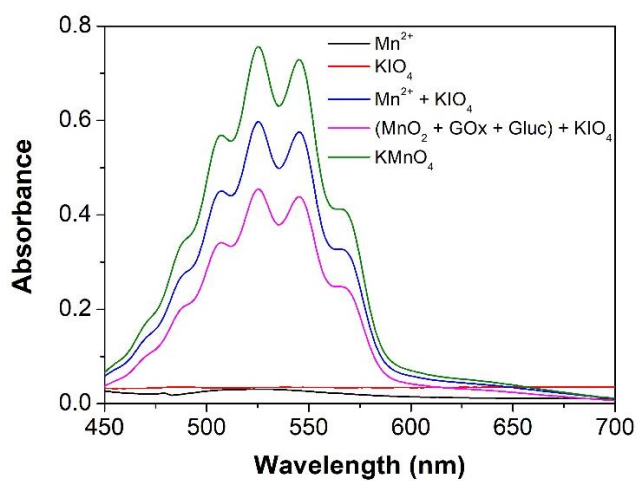

Figure S4. Absorption spectra of Mn<sup>2+</sup>, KIO<sub>4</sub>, Mn<sup>2+</sup> + KIO<sub>4</sub>, MnO<sub>2</sub> nanosheet + GOx + glucose + KIO<sub>4</sub>, and KMnO<sub>4</sub>.

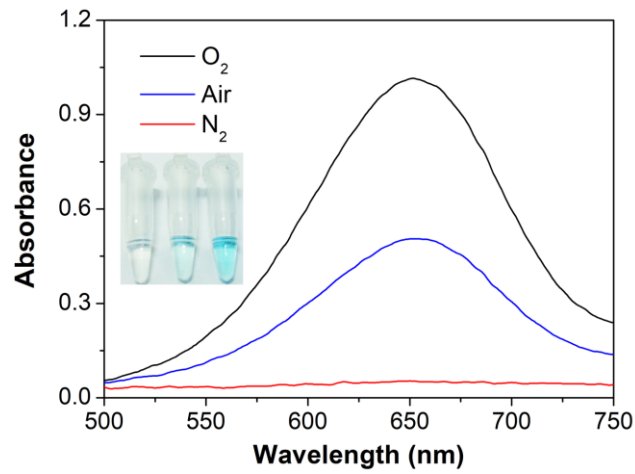

Figure S5. Absorption spectra of TMB produced from the cascade reaction of GOx and HRP at different conditions.

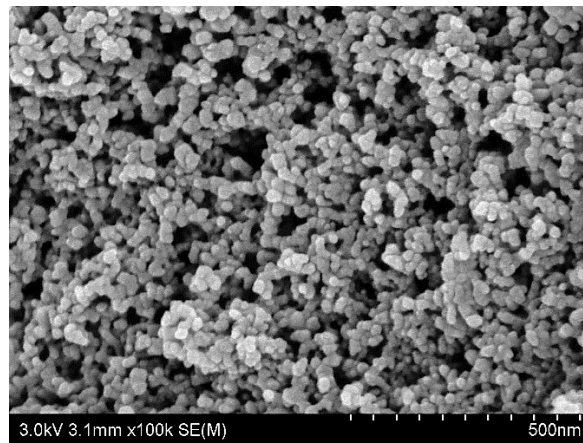

Figure S6. SEM image of ZnCPs.

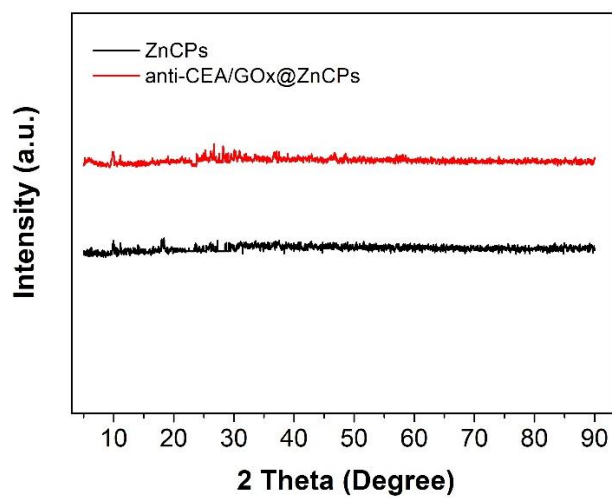

Figure S7. Powder XRD patterns of ZnCPs and anti-CEA/GOx@ZnCPs.

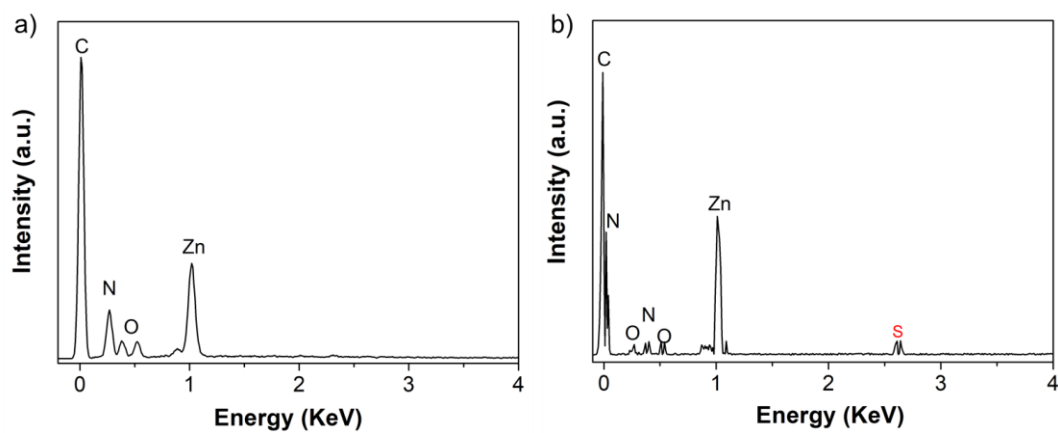

Figure S8. EDS spectra of ZnCPs (a) and anti-CEA/GOx@ZnCPs (b).

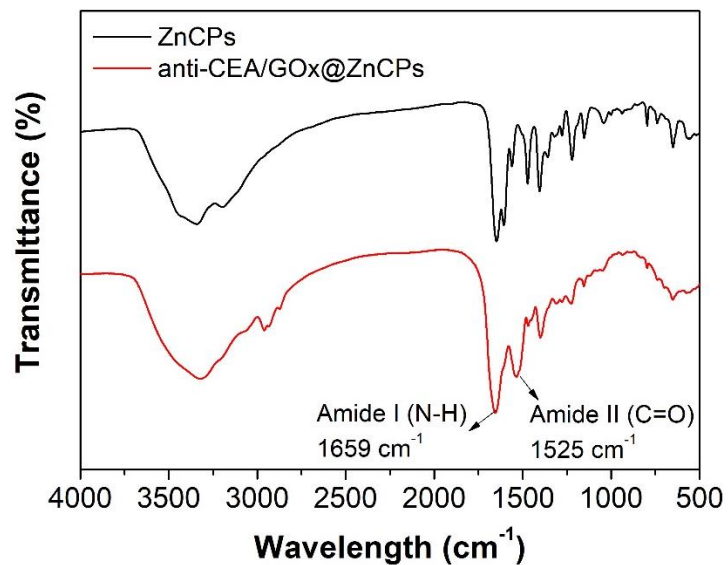

Figure S9. FTIR spectra of ZnCPs and anti-CEA/GOx@ZnCPs.

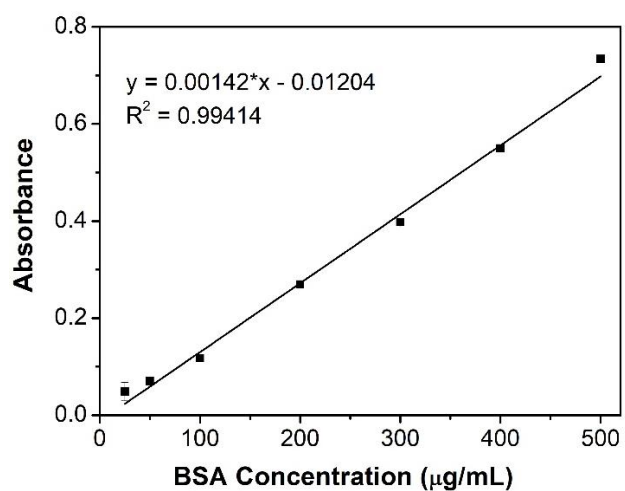

Figure S10. Calibration curve of the absorbance of BCA reagent at 560 nm as a function of BSA concentrations.

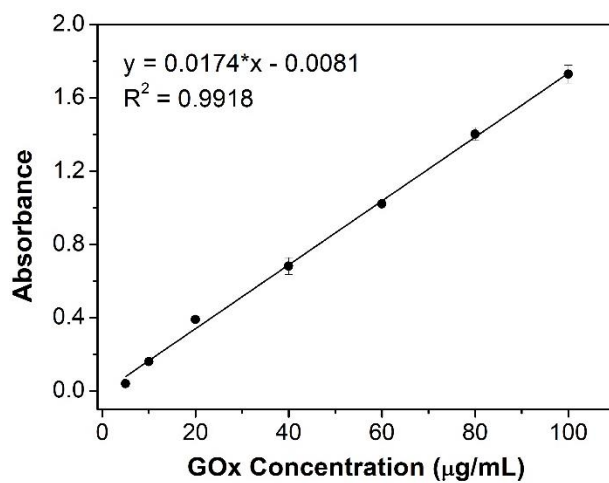

Figure S11. Calibration curve of the absorbance of oxTMB at 615 nm as a function of GOx concentrations.

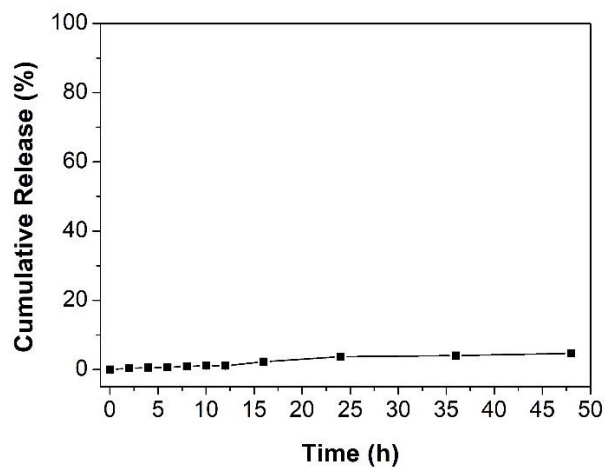

Figure S12. Cumulative release rate of proteins from anti-CEA/GOx@ZnCPs in HEPES buffer (10 mM, pH 7.4).

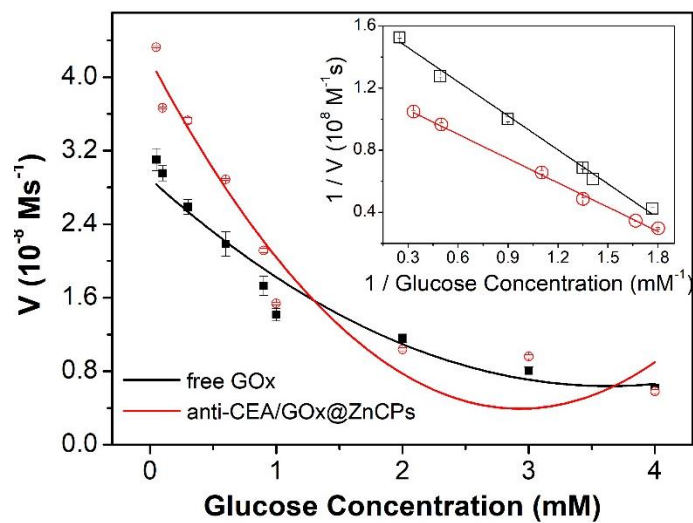

Figure S13. Steady-state kinetic assay of free GOx and anti-CEA/GOx@ZnCPs and their corresponding double-reciprocal plots (inset).

Table S1. Kinetic data of free GOx and anti-CEA/GOx@ZnCPs

| Catalyst           | $K_m$ (mM) | $V_{max}$ ( $10^{-8} \text{ M s}^{-1}$ ) |
|--------------------|------------|------------------------------------------|
| free GOx           | 0.44       | 0.53                                     |
| anti-CEA/GOx@ZnCPs | 0.43       | 0.82                                     |



Table S2. Comparison of various immunoassays for CEA detection.

| Antibody labels    | Readout signal    | Linear range<br>(ng/mL) | LOD<br>(pg/mL) | Refs.     |
|--------------------|-------------------|-------------------------|----------------|-----------|
| Gold nanoparticle  | Colorimetric      | 0.05 - 50               | 48             | 1         |
| HRP labeled AuNP   | Colorimetric      | 6 - 781                 | 12000          | 2         |
| HRP                | Electrochemical   | 0.5 - 167               | 100            | 3         |
| AuNP               | Chemiluminescence | 5 - 20                  | 100            | 4         |
| Eu <sup>3+</sup>   | Fluorescence      | 1 - 1000                | 500            | 5         |
| anti-CEA/GOx@ZnCPs | Colorimetric      | 2 - 160                 | 50             | This work |

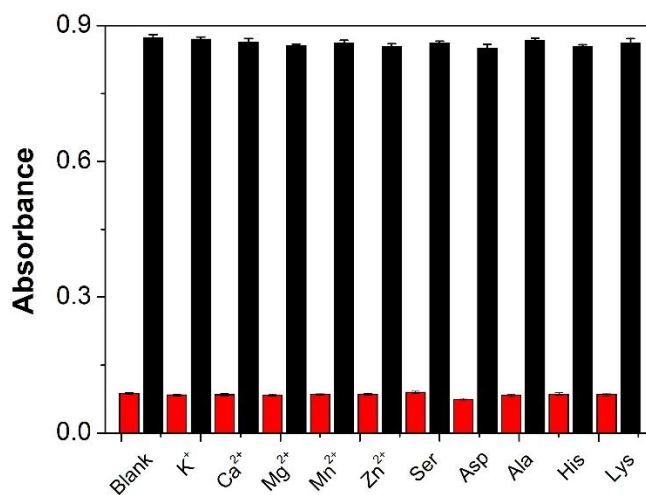

Figure 14. Effects of metal ions and biological species on the colorimetric immunoassay based on anti-CEA/GOx@ZnCPs as a detection antibody. Black bars represent the addition of single interfering material (100 μM). Red bars represent the addition of the mixture of CEA (150 pg/mL) and interfering materials (100 μM).

Table S3. Determination of CEA in serum samples

| Added (ng/mL) | Detected (ng/mL) | Recovery (%) | RSD (n=3, %) | Kit assay (ng/mL) |
|---------------|------------------|--------------|--------------|-------------------|
| 5             | 5.0              | 100.0        | 2.6          | 4.9               |
| 30            | 30.8             | 102.7        | 2.8          | 30.1              |
| 120           | 120.5            | 100.4        | 0.8          | 121.3             |

## References

1. Liu, M.; Jia, C.; Jin, Q.; Lou, X.; Yao, S.; Xiang, J.; Zhao, J., Novel colorimetric enzyme immunoassay for the detection of carcinoembryonic antigen. *Talanta* **2010**, *81*, 1625-1629.
2. Liu, M.; Jia, C.; Huang, Y.; Lou, X.; Yao, S.; Jin, Q.; Zhao, J.; Xiang, J., Highly sensitive protein detection using enzyme-labeled gold nanoparticle probes. *Analyst* **2010**, *135*, 327-331.
3. Dai, Z.; Yan, F.; Yu, H.; Hu, X.; Ju, H., Novel amperometric immunosensor for rapid separation-free immunoassay of carcinoembryonic antigen. *J. Immunol. Methods* **2004**, *287*, 13-20.
4. Yang, X.; Guo, Y.; Wang, A., Luminol/antibody labeled gold nanoparticles for chemiluminescence immunoassay of carcinoembryonic antigen. *Anal. Chim. Acta* **2010**, *666*, 91-96.
5. Hou, J.-Y.; Liu, T.-C.; Lin, G.-F.; Li, Z.-X.; Zou, L.-P.; Li, M.; Wu, Y.-S., Development of an immunomagnetic bead-based time-resolved fluorescence immunoassay for rapid determination of levels of carcinoembryonic antigen in human serum. *Anal. Chim. Acta* **2012**, *734*, 93-98.
